# Supplementary material
Source: publisher figshare collection journal article supplement (https://karger.figshare.com/ndownloader/files/9231892)
Supplement: Supplementary file 1 [file 9231892]

Supplementary table s1

**Factors associated with smoking trajectories (ELFE study, n=15,540, 2011): multivariable multinomial analysis (OR, 95% CI) - ‘quitters’ as the reference category.**

|  |  | **Non-smokers** | **Quitters** | **Persistent moderate smokers** | **Persistent heavy smokers** |
| --- | --- | --- | --- | --- | --- |
| **n=9226** | **n=3068** | **n=1790** | **n=1456** |
| **OR (CI 95%)** |  | **OR (CI 95%)** | OR (CI 95%) |
| **Migrant Status** | **French** | *1* | *reference* | *1* | *1* |
| 2nd generation | 1.37 (1.19- 1.57) |  | 1.27 (1.05- 1.54) | 0.93 (0.74- 1.16) |
| 1st generation | 3.82 (3.13- 4.68) |  | 1.18 (0.88- 1.59) | 0.44 (0.29- 0.66) |
| **Mother's age** | >30 years | *1* | *reference* | *1* | *1* |
| <30 years | 1.31 (1.19- 1.44) |  | 1.31 (1.14- 1.51) | 1.1 (0.94- 1.28) |
| **Educational level** | >Bac | *1* | *reference* | *1* | *1* |
| < High school | 0.75 (0.65- 0.87) |  | 1.51 (1.26- 1.81) | 2.98 (2.45- 3.63) |
| High school | 0.82 (0.73- 0.93) |  | 1.39 (1.18- 1.64) | 2.02 (1.68- 2.43) |
| **Number of children** | **≥Two** | *1* | *reference* | *1* | *1* |
| One | 0.78 (0.71- 0.86) |  | 0.85 (0.74- 0.97) | 0.85 (0.73- 0.99) |
| **Residential area** | **Ile de France** | *1* | *reference* | *1* | *1* |
| Parisian Basin | 0.81 (0.68- 0.97) |  | 0.79 (0.64- 0.99) | 0.86 (0.67- 1.11) |
| Nord-Pas de Calais | 1.02 (0.82- 1.29) |  | 0.98 (0.75- 1.27) | 1.1 (0.81- 1.48) |
| East | 0.92 (0.74- 1.14) |  | 0.88 (0.69- 1.14) | 1.17 (0.88- 1.56) |
| West | 0.75 (0.62- 0.9) |  | 0.86 (0.69- 1.08) | 0.89 (0.68- 1.16) |
| South-West | 0.76 (0.61- 0.94) |  | 0.89 (0.69- 1.15) | 0.9 (0.66- 1.23) |
| Centre-East | 0.87 (0.71- 1.07) |  | 0.93 (0.72- 1.19) | 0.94 (0.69- 1.27) |
| Others | 0.81 (0.66- 0.98) |  | 0.92 (0.73- 1.16) | 0.95 (0.72- 1.26) |
| **Psychological difficulties** | No | *1* | *reference* | *1* | *1* |
| Yes | 0.82 (0.72- 0.94) |  | 1.03 (0.86- 1.24) | 1.09 (0.89- 1.33) |
| **Lifetime weight-loss diet** | **No (Normal BMI)** | *1* | *reference* | *1* | *1* |
| Yes (Normal BMI) | 0.72 (0.64- 0.82) |  | 0.73 (0.61- 0.86) | 0.79 (0.63- 1.01) |
| No (Overweight) | 1.1 (0.95- 1.27) |  | 0.84 (0.65- 1.08) | 1.06 (0.85- 1.32) |
| Yes (Overweight) | 0.81 (0.71- 0.92) |  | 0.58 (0.47- 0.73) | 0.74 (0.59- 0.92) |
| **Occupational grade** | High | *1* | *reference* | *1* | *1* |
| Intermediate | 0.96 (0.83- 1.12) |  | 1.17 (0.89- 1.53) | 2.39 (1.47- 3.9) |
| Low | 0.85 (0.73- 0.98) |  | 1.29 (0.99- 1.66) | 3 (1.87- 4.81) |
| No occupation | 0.97 (0.71- 1.31) |  | 1.49 (0.97- 2.27) | 3.39 (1.88- 6.09) |
| **Perceived financial problem** | **No** | *1* | *reference* | *1* | *1* |
| Yes | 0.93 (0.85- 1.02) |  | 1 (0.88- 1.14) | 1.35 (1.17- 1.56) |
| **Mother's employment status** | Working | *1* | *reference* | *1* | *1* |
| Out of the job market | 1.31 (1.11- 1.56) |  | 1.26 (1.01- 1.58) | 1.6 (1.26- 2.03) |
| Unemployed | 0.84 (0.69- 1.03) |  | 1.03 (0.79- 1.34) | 1.41 (1.08- 1.84) |
| **Father's employment status** | Working | *1* | *reference* | *1* | *1* |
| Out of the job market | 1.05 (0.8- 1.38) |  | 0.89 (0.62- 1.28) | 0.98 (0.68- 1.42) |
| Unemployed | 1.01 (0.79- 1.29) |  | 0.9 (0.66- 1.24) | 1.11 (0.81- 1.51) |
| **Alcohol use during pregnancy** | **No** | *1* | *reference* | *1* | *1* |
| <once per month | 0.77 (0.69- 0.87) |  | 1.12 (0.95- 1.32) | 1.1 (0.91- 1.34) |
| ≥once per month | 0.63 (0.51- 0.79) |  | 1.37 (1.03- 1.82) | 1.99 (1.46- 2.72) |
| **Mistimed pregnancy** | No | *1* | *reference* | *1* | *1* |
| Yes | 0.91 (0.79- 1.05) |  | 1.19 (0.99- 1.44) | 1.48 (1.21- 1.80) |
| **Child feeding method at birth** | **Breast feeding** | *1* | *reference* | *1* | *1* |
| Formula | 1.13 (1.02- 1.25) |  | 1.67 (1.46- 1.92) | 2.34 (2.02- 2.71) |
| **Partner’s tobacco use** | no | *1* | *reference* | *1* | *1* |
| Yes | 0.59 (0.53- 0.65) |  | 3.94 (3.37- 4.62) | 5.19 (4.4- 6.11) |
| **Partner's support during pregnancy** | well surrounded | *1* | *reference* | *1* | *1* |
| No/ seldom | 1.05 (0.89- 1.24) |  | 1.31 (1.05- 1.62) | 1.30 (1.02- 1.66) |
| not in a couple | 1.11 (0.84- 1.45) |  | 1.53 (1.06- 2.21) | 2.59 (1.82- 3.68) |
| **Maternity type** | **Private** | *1* | *reference* | *1* | *1* |
| Public | 1.06 (0.95- 1.19) |  | 1.00 (0.87- 1.14) | 1.30 (1.11- 1.52) |
